# Supplementary material for: Validation of risk prediction models for the development of HBV-related HCC: a retrospective multi-center 10-year follow-up cohort study
Source: PubMed Central journal article supplement (PMC5762585; doi:10.18632/oncotarget.22375), 2017-11-03
Supplement: oncotarget-08-113213-s001.pdf [file oncotarget-08-113213-s001.pdf]

# Validation of risk prediction models for the development of HBV-related HCC: a retrospective multi-center 10-year follow-up cohort study

## SUPPLEMENTARY MATERIALS

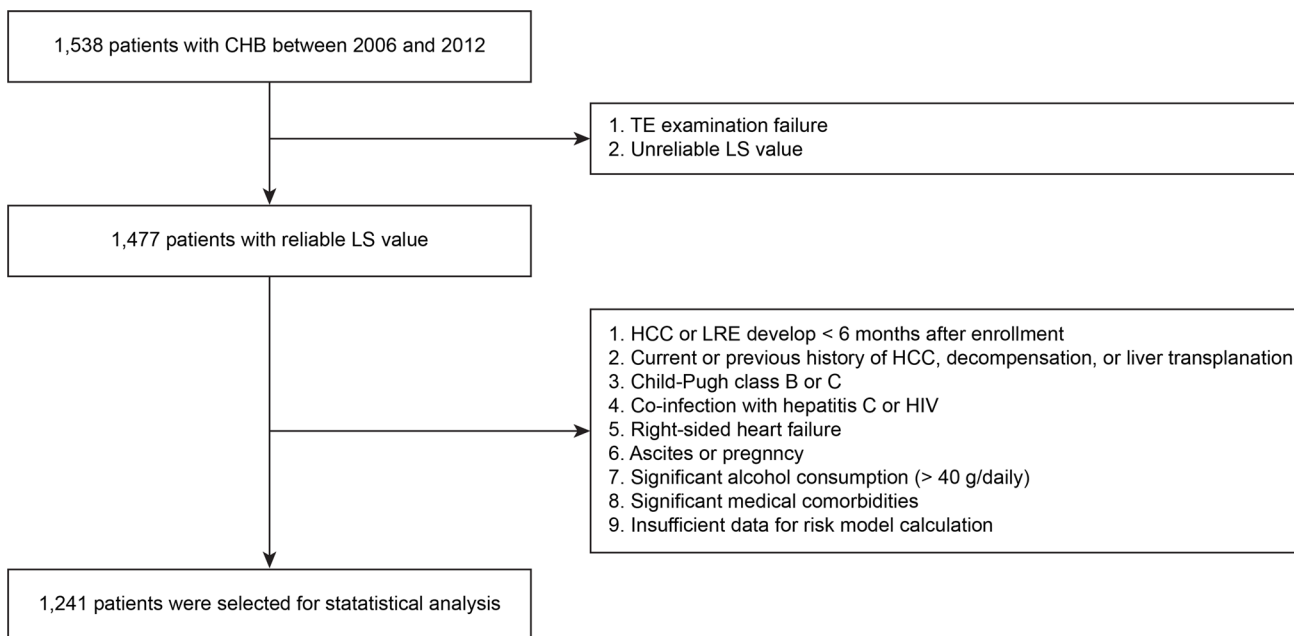

**Supplementary Figure 1: Flow chart of study population selection.** Among 1,538 patients with CHB, 1,477 with reliable LS values were enrolled, and after excluding 236 patients according to our exclusion criteria, 1,241 patients were included in the final statistical analysis. CHB, chronic hepatitis B; LS, liver stiffness; HCC, hepatocellular carcinoma; LRE, liver-related event.

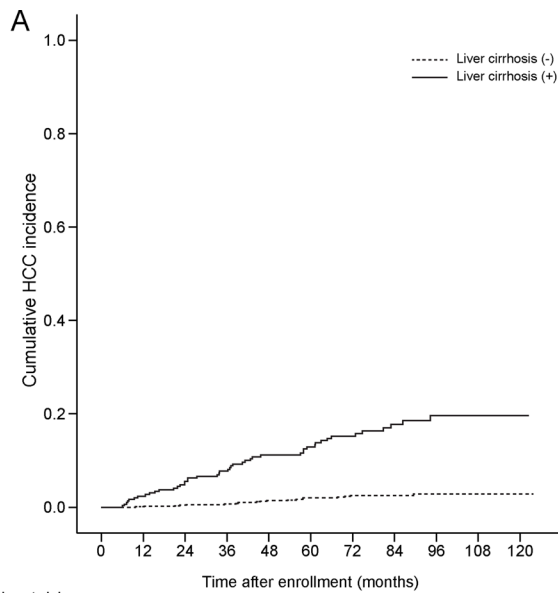

| No. at risk         |     | Time after enrollment (months) |     |     |     |    |    |    |    |    |     |     |
|---------------------|-----|--------------------------------|-----|-----|-----|----|----|----|----|----|-----|-----|
|                     |     | 0                              | 12  | 24  | 36  | 48 | 60 | 72 | 84 | 96 | 108 | 120 |
| Liver cirrhosis (-) | 940 | 915                            | 760 | 517 | 258 | 10 |    |    |    |    |     |     |
| Liver cirrhosis (+) | 301 | 266                            | 223 | 158 | 71  | 1  |    |    |    |    |     |     |

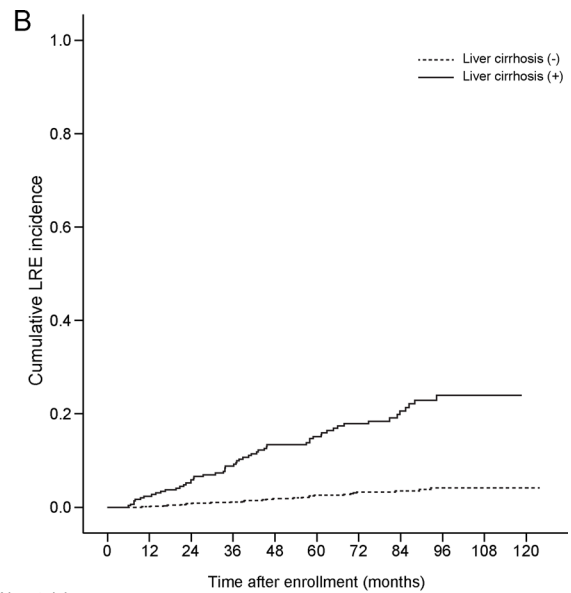

| No. at risk         |     | Time after enrollment (months) |     |     |     |    |    |    |    |    |     |     |
|---------------------|-----|--------------------------------|-----|-----|-----|----|----|----|----|----|-----|-----|
|                     |     | 0                              | 12  | 24  | 36  | 48 | 60 | 72 | 84 | 96 | 108 | 120 |
| Liver cirrhosis (-) | 940 | 876                            | 759 | 516 | 258 | 11 |    |    |    |    |     |     |
| Liver cirrhosis (+) | 301 | 265                            | 220 | 156 | 68  | 0  |    |    |    |    |     |     |

**Supplementary Figure 2: Cumulative incidence rates of HCC and LRE according to the presence of liver cirrhosis (Kaplan-Meier plot).** The cumulative incidence rates of HCC in patients without liver cirrhosis at 3, 5, and 7 years were 0.7%, 2.0%, and 2.5%, whereas those in patients with liver cirrhosis were 1.1%, 2.6%, and 3.5%, respectively (A). Additionally, the cumulative incidence rates of LRE in patients without liver cirrhosis at 3, 5, and 7 years were 7.7%, 12.9%, and 17.8.5%, whereas those in patients with liver cirrhosis were 8.8%, 15.1%, and 20.1%, respectively (B). HCC, hepatocellular carcinoma; LRE, liver-related event.

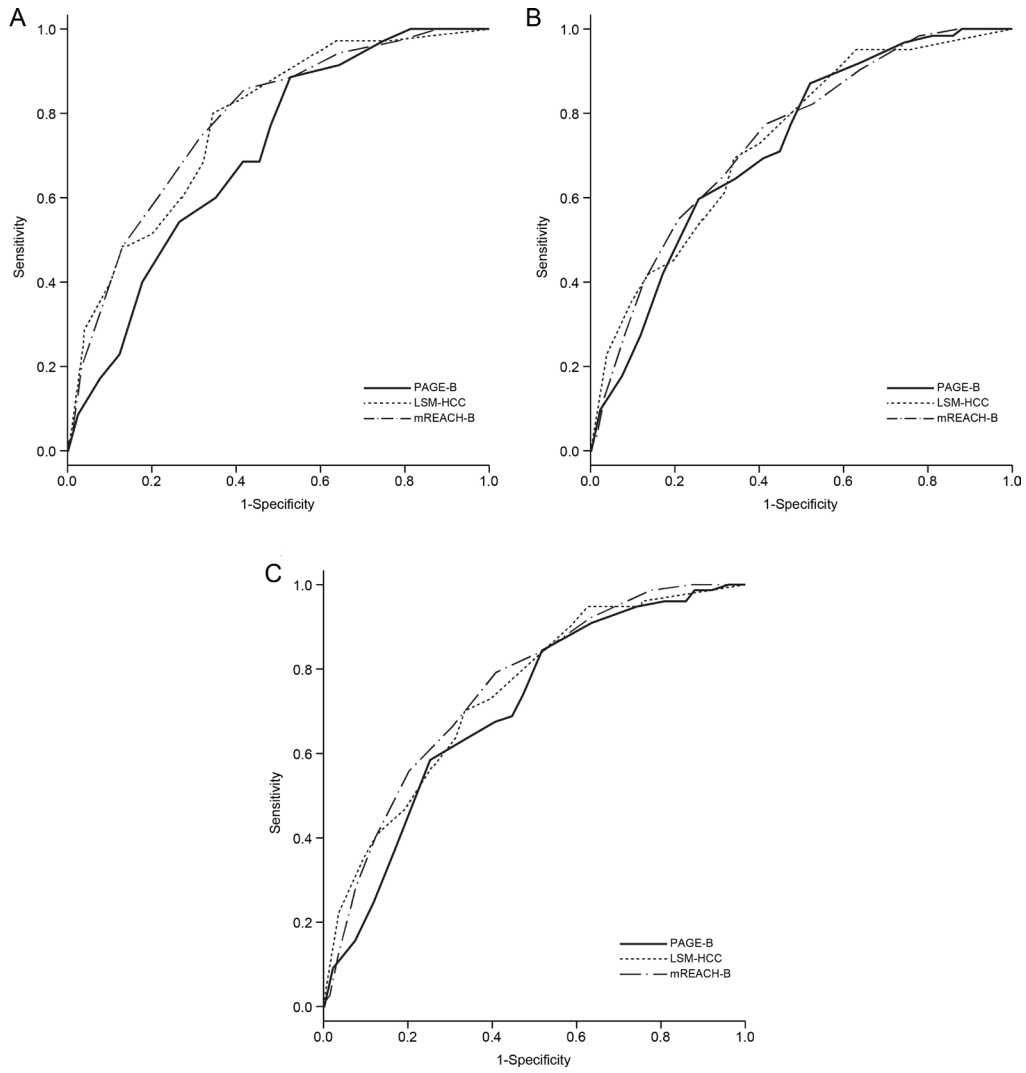

**Supplementary Figure 3:** Receiver operating characteristic curves of the PAGE-B, LSM-HCC, and mREACH-B scores for the prediction of LRE development at 3 (A), 5 (B), and 7 years (C) in the entire study population. LRE, liver-related event.

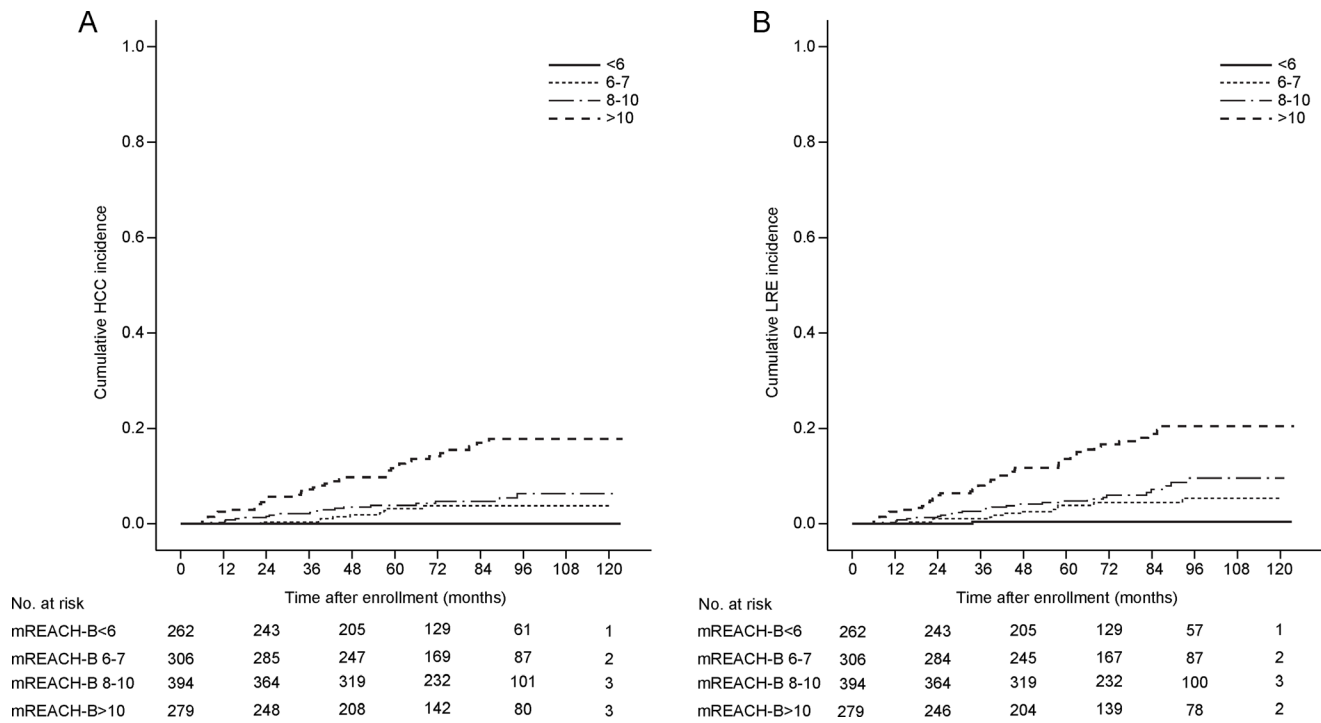

**Supplementary Figure 4:** Cumulative incidence rates of HCC (A) and LRE (B) according to the cut-off values of mREACH-B (Kaplan-Meier plot). The cumulative incidence rates of HCC (A) and LRE development (B) were significantly different between the low-risk and low-intermediate-risk groups and between the high-intermediate-risk and high-risk groups (all  $P < 0.05$ , log-rank test), whereas they were similar between the low-intermediate-risk and high-intermediate risk groups ( $P = 0.270$ , log-rank test). Similar trends were noted in regard to LRE development. HCC, hepatocellular carcinoma; LRE, liver-related event.

**Supplementary Table 1: Constituent variables and calculation methods of risk prediction**

| Variable                         | PAGE-B             | REACH-B       | mREACH-B    |
|----------------------------------|--------------------|---------------|-------------|
| Age, years                       | 16–29: 0           | 30–34: 0      | 30–34: 0    |
|                                  | 30–39: 2           | 35–39: 1      | 35–39: 1    |
|                                  | 40–49: 4           | 40–44: 2      | 40–44: 2    |
|                                  | 50–59: 6           | 45–49: 3      | 45–49: 3    |
|                                  | 60–69: 8           | 50–54: 4      | 50–54: 4    |
|                                  | ≥70: 10            | 55–59: 5      | 55–59: 5    |
|                                  |                    | 60–65: 6      | 60–65: 6    |
| Gender                           | Male: 6            | Male: 2       | Male: 2     |
|                                  | Female: 0          | Female: 0     | Female: 0   |
| Alanine aminotransferase, IU/L   | NA                 | < 15: 0       | < 15: 0     |
|                                  |                    | 15–44: 1      | 15–44: 1    |
|                                  |                    | ≥ 45: 2       | ≥ 45: 2     |
| HBeAg                            | NA                 | Positive: 2   | Positive: 2 |
|                                  |                    | Negative: 0   | Negative: 0 |
| HBV DNA, log copies/mL           | NA                 | < 4 log: 0    | NA          |
|                                  |                    | 4–5 log: 3    |             |
|                                  |                    | 5–6 log: 5    |             |
|                                  |                    | ≥ 6 log: 4    |             |
| Platelet count, /mm <sup>3</sup> | ≥ 200,000: 0       | NA            | NA          |
|                                  | 100,000–199,999: 6 |               |             |
|                                  | < 100,000: 9       |               |             |
| Liver stiffness, kPa             | NA                 | ≤8 kPa: 0     | < 8 kPa: 0  |
|                                  |                    | 8.1–12 kPa: 8 | 8–13 kPa: 2 |
|                                  |                    | > 12 kPa: 14  | > 13 kPa: 4 |

NA, not applicable; HBeAg, hepatitis B e antigen; kPa, kilopascal.

**Supplementary Table 2: Comparison of the prognostic accuracy of risk prediction models for LRE development**

| Study groups<br>Prediction models   | At 3 years |             |                             | At 5 years |             |                             | At 7 years |             |                             |
|-------------------------------------|------------|-------------|-----------------------------|------------|-------------|-----------------------------|------------|-------------|-----------------------------|
|                                     | AUC        | 95% CI      | <i>P</i> value <sup>1</sup> | AUC        | 95% CI      | <i>P</i> value <sup>1</sup> | AUC        | 95% CI      | <i>P</i> value <sup>1</sup> |
| All ( <i>n</i> = 1,241)             |            |             |                             |            |             |                             |            |             |                             |
| PAGE-B                              | 0.704**    | 0.631–0.777 | 0.048                       | 0.721**    | 0.664–0.778 | 0.602                       | 0.704**    | 0.650–0.758 | 0.128                       |
| REACH-B                             | -          | -           | -                           | -          | -           | -                           | -          | -           | -                           |
| LSM-HCC                             | 0.777**    | 0.706–0.848 | 0.798                       | 0.735**    | 0.675–0.796 | 0.809                       | 0.742**    | 0.688–0.796 | 0.465                       |
| mREACH-B                            | 0.782**    | 0.711–0.853 | -                           | 0.739**    | 0.681–0.798 | -                           | 0.753**    | 0.702–0.803 | -                           |
| With normal ALT ( <i>n</i> = 707)   |            |             |                             |            |             |                             |            |             |                             |
| PAGE-B                              | 0.738*     | 0.655–0.820 | 0.388                       | 0.708**    | 0.636–0.781 | 0.727                       | 0.685**    | 0.607–0.763 | 0.436                       |
| REACH-B                             | -          | -           | -                           | -          | -           | -                           | -          | -           | -                           |
| LSM-HCC                             | 0.779**    | 0.693–0.864 | 0.684                       | 0.739**    | 0.663–0.814 | 0.630                       | 0.719**    | 0.647–0.792 | 0.888                       |
| mREACH-B                            | 0.792**    | 0.699–0.885 | -                           | 0.726**    | 0.648–0.805 | -                           | 0.723**    | 0.653–0.793 | -                           |
| With high ALT ( <i>n</i> = 534)     |            |             |                             |            |             |                             |            |             |                             |
| PAGE-B                              | 0.680*     | 0.564–0.796 | 0.027                       | 0.739**    | 0.649–0.828 | 0.684                       | 0.733**    | 0.658–0.807 | 0.164                       |
| REACH-B                             | -          | -           | -                           | -          | -           | -                           | -          | -           | -                           |
| LSM-HCC                             | 0.776**    | 0.663–0.889 | 0.706                       | 0.737**    | 0.641–0.834 | 0.363                       | 0.768**    | 0.689–0.846 | 0.352                       |
| mREACH-B                            | 0.768**    | 0.659–0.876 | -                           | 0.756**    | 0.671–0.841 | -                           | 0.786**    | 0.717–0.855 | -                           |
| Without cirrhosis ( <i>n</i> = 940) |            |             |                             |            |             |                             |            |             |                             |
| PAGE-B                              | 0.673      | 0.537–0.810 | 0.422                       | 0.729**    | 0.642–0.817 | 0.435                       | 0.670*     | 0.572–0.767 | 0.879                       |
| REACH-B                             | 0.619      | 0.494–0.745 | 0.203                       | 0.626*     | 0.519–0.733 | 0.481                       | 0.600      | 0.494–0.705 | 0.222                       |
| LSM-HCC                             | 0.789*     | 0.697–0.880 | 0.256                       | 0.709*     | 0.615–0.813 | 0.299                       | 0.701**    | 0.605–0.796 | 0.507                       |
| mREACH-B                            | 0.734*     | 0.602–0.883 | -                           | 0.674*     | 0.570–0.779 | -                           | 0.680*     | 0.591–0.769 | -                           |
| With cirrhosis ( <i>n</i> = 301)    |            |             |                             |            |             |                             |            |             |                             |
| PAGE-B                              | 0.592      | 0.481–0.703 | 0.210                       | 0.607*     | 0.514–0.700 | 0.536                       | 0.607*     | 0.524–0.689 | 0.244                       |
| REACH-B                             | -          | -           | -                           | -          | -           | -                           | -          | -           | -                           |
| LSM-HCC                             | 0.663*     | 0.549–0.777 | 0.722                       | 0.631*     | 0.538–0.725 | 0.706                       | 0.645*     | 0.563–0.728 | 0.391                       |
| mREACH-B                            | 0.674*     | 0.568–0.780 | -                           | 0.641*     | 0.556–0.726 | 0.706                       | 0.666**    | 0.590–0.741 | -                           |

<sup>1</sup>*P* value indicates the comparison between mREACH-B and other prediction models. AUC\* and \*\* indicate *P* value of < 0.05 and < 0.001, respectively. LRE, liver-related event; AUC, area under curve; CI, confidence interval; ALT, alanine aminotransferase.
